# Supplementary material for: Dimethylalkoxygallane incorporating a donor-functionalised alkoxide: the monomeric gas-phase structure
Source: Royal Society of Chemistry journal article supplement (doi:10.1039/b817893n), 2008-01-01
Supplement: b817893n.pdf [file b817893n.pdf]

## Dimethylalkoxygallane incorporating a donor-functionalised alkoxide: the monomeric gas-phase structure

Caroline E. Knapp, Claire J. Carmalt, Paul F. McMillan, Derek A. Wann, Heather E. Robertson and David W. H. Rankin

### Electronic Supplementary Information

**Table S1** Nozzle-to-film distances / mm, weighting functions / nm<sup>-1</sup>, scale factors, correlation parameters and electron wavelengths / pm used in the electron diffraction study of Me<sub>2</sub>GaOCH<sub>2</sub>CH<sub>2</sub>NMe<sub>2</sub>.

| Nozzle-to-film distance <sup>a</sup> | $\Delta s$ | $s_{\min}$ | $sw_1$ | $sw_2$ | $s_{\max}$ | Scale factor <sup>b</sup> | Correlation parameter | Electron wavelength |
|--------------------------------------|------------|------------|--------|--------|------------|---------------------------|-----------------------|---------------------|
| 93.39                                | 0.4        | 10.0       | 12.0   | 27.6   | 30.0       | 0.900(38)                 | 0.334                 | 6.18                |
| 254.54                               | 0.2        | 2.0        | 4.0    | 12.0   | 13.0       | 1.282(37)                 | 0.344                 | 6.18                |

<sup>a</sup> Determined by reference to the scattering pattern of benzene. <sup>b</sup> Values in parentheses are the estimated standard deviations.

**Table S2** GED coordinates (in Å) for Me<sub>2</sub>GaOCH<sub>2</sub>CH<sub>2</sub>NMe<sub>2</sub>.

| Atom  | <i>x</i> | <i>y</i> | <i>z</i> |
|-------|----------|----------|----------|
| C(1)  | 1.7386   | 1.9461   | 3.0477   |
| C(2)  | 1.2864   | 4.0551   | 0.1823   |
| C(3)  | -1.7980  | 3.2018   | 0.5985   |
| Ga(4) | 1.1479   | 2.3115   | 1.1653   |
| O(5)  | 1.1653   | 0.8031   | 0.0000   |
| C(6)  | 0.0000   | 0.0000   | 0.0000   |
| C(7)  | -1.2717  | 0.8765   | 0.0000   |
| H(8)  | 2.8089   | 2.0875   | 3.1493   |
| H(9)  | 1.2424   | 2.6141   | 3.7431   |
| H(10) | 1.5042   | 0.9266   | 3.3334   |
| H(11) | 0.8419   | 3.9771   | -0.8038  |
| H(12) | 0.7734   | 4.8431   | 0.7225   |
| H(13) | 2.3237   | 4.3478   | 0.0627   |
| H(14) | -1.3314  | 3.5688   | -0.3090  |
| H(15) | -2.8515  | 3.0433   | 0.3960   |
| H(16) | -1.7122  | 3.9716   | 1.3573   |
| H(17) | 0.0000   | -0.6471  | -0.8702  |
| H(18) | 0.0000   | -0.6471  | 0.8702   |
| H(19) | -2.1480  | 0.2748   | 0.2150   |
| H(20) | -1.4029  | 1.3559   | -0.9638  |
| N(21) | -1.1519  | 1.9401   | 1.0511   |
| C(22) | -1.5070  | 1.3876   | 2.3885   |
| H(23) | -0.8384  | 0.5709   | 2.6375   |
| H(24) | -1.4176  | 2.1628   | 3.1415   |
| H(25) | -2.5256  | 1.0156   | 2.3929   |

**Table S3** Calculated coordinates [MP2(full)/6-311+G\*] for Me<sub>2</sub>GaOCH<sub>2</sub>CH<sub>2</sub>NMe<sub>2</sub>.

| Atom  | <i>x</i> | <i>y</i> | <i>z</i> |
|-------|----------|----------|----------|
| C(1)  | -1.5511  | -0.0374  | 1.8724   |
| C(2)  | -1.7348  | -0.9389  | -1.4900  |
| C(3)  | 1.4189   | -1.8337  | -0.5950  |
| Ga(4) | -0.9184  | 0.0576   | 0.0037   |
| O(5)  | -0.2770  | 1.7407   | -0.5274  |
| C(6)  | 1.0969   | 1.8797   | -0.3170  |
| C(7)  | 1.8055   | 0.5712   | -0.6672  |
| H(8)  | -2.6077  | 0.2448   | 1.9171   |
| H(9)  | -1.4773  | -1.0455  | 2.2931   |
| H(10) | -1.0091  | 0.6461   | 2.5314   |
| H(11) | -1.1740  | -0.8099  | -2.4201  |
| H(12) | -1.8247  | -2.0110  | -1.2886  |
| H(13) | -2.7466  | -0.5643  | -1.6757  |
| H(14) | 1.0163   | -1.8076  | -1.6072  |
| H(15) | 2.4954   | -2.0436  | -0.6373  |
| H(16) | 0.9236   | -2.6340  | -0.0412  |
| H(17) | 1.4999   | 2.6720   | -0.9623  |
| H(18) | 1.3297   | 2.1710   | 0.7221   |
| H(19) | 2.8860   | 0.5929   | -0.4587  |
| H(20) | 1.6581   | 0.3813   | -1.7343  |
| N(21) | 1.1632   | -0.5461  | 0.0708   |
| C(22) | 1.6658   | -0.6084  | 1.4553   |
| H(23) | 1.5002   | 0.3441   | 1.9563   |
| H(24) | 1.1280   | -1.3825  | 2.0037   |
| H(25) | 2.7394   | -0.8372  | 1.4614   |

Energy = -2290.99283 Hartrees (not corrected for ZPE).
